# Supplementary material
Source: PubMed Central journal article supplement (PMC11307781)

Rarefaction curve of all samples

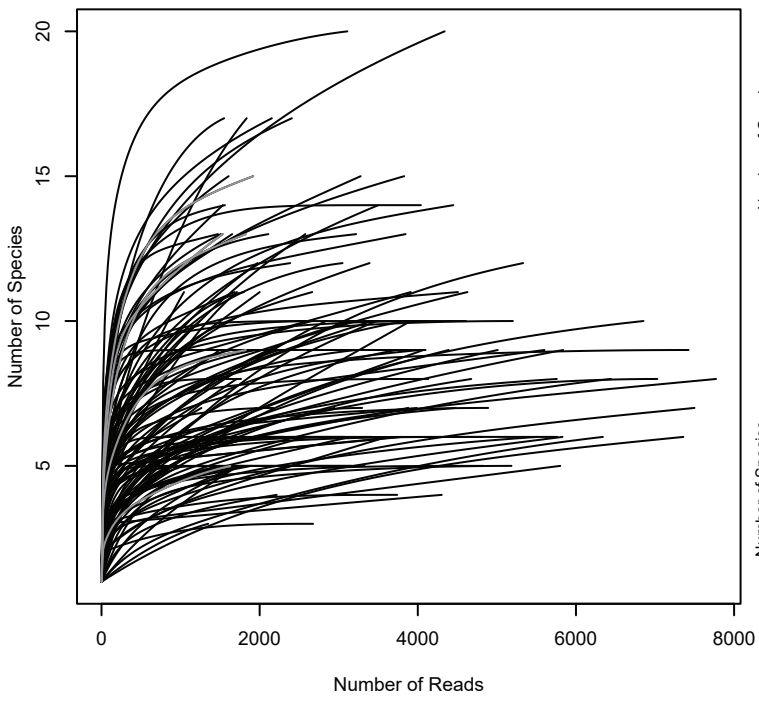

Rarefaction curves of samples at different timepoints

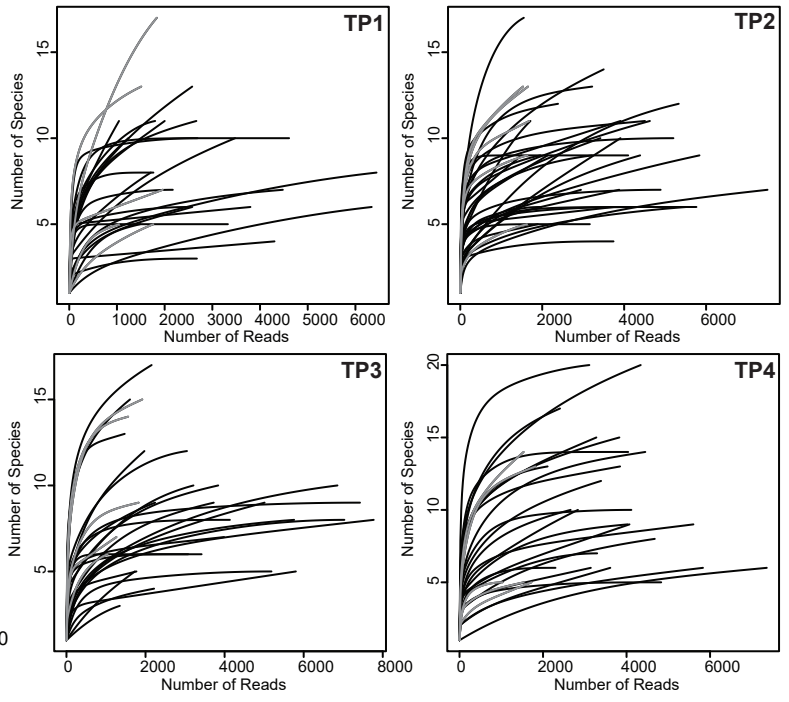

Supplement: mmc1.pdf [file mmc1.pdf]
